# Supplementary material for: Antagonism between Front-Line Antibiotics Clarithromycin and Amikacin in the Treatment of Mycobacterium abscessus Infections Is Mediated by the whiB7 Gene
Source: PubMed Central journal article supplement (PMC5655113; doi:10.1128/aac.01353-17), 2017-10-24
Supplement: AAC.01353-17_zac011176656s1.pdf [file AAC.01353-17_zac011176656s1.pdf]

1 Supplemental Figure S1.

2 Map of pWhiB7-C

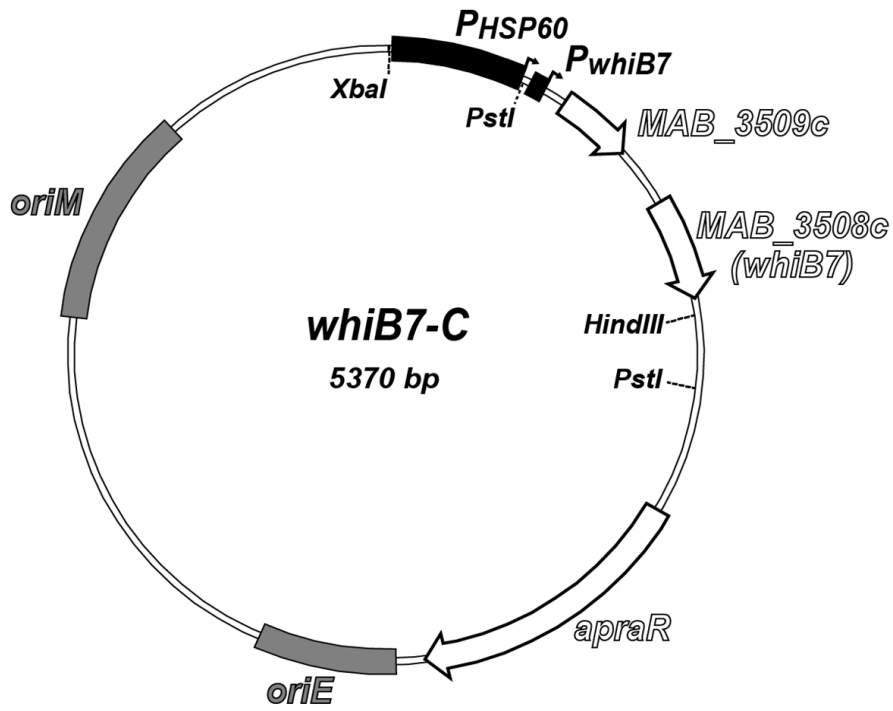

- 3
- 4
- 5
- 6
- 7
- 8
- 9
- 10
- 11
- 12
- 13
- 14
- 15
- 16
- 17
- 18
- 19
- 20
- 21
- 22
- 23
- 24
- 25

26 **Supplemental Figure S1. *whiB7* (MAB\_3508c) sequence.**

|    |    |            |                                          |            |
|----|----|------------|------------------------------------------|------------|
| 27 | ID | whiB7-C    | standard; circular DNA;                  | ; 5370 BP. |
| 28 | FH | Key        | Location/Qualifiers                      |            |
| 29 | FH |            |                                          |            |
| 30 | FT | CDS        | 508..720                                 |            |
| 31 | FT |            | /vntifkey="4"                            |            |
| 32 | FT |            | /label=MAB_3509c                         |            |
| 33 | FT | CDS        | 890..1174                                |            |
| 34 | FT |            | /vntifkey="4"                            |            |
| 35 | FT |            | /label=MAB_3508c\ (whiB7)                |            |
| 36 | FT | rep_origin | 4134..4734                               |            |
| 37 | FT |            | /vntifkey="33"                           |            |
| 38 | FT |            | /label=oriM                              |            |
| 39 | FT | promoter   | 7..377                                   |            |
| 40 | FT |            | /vntifkey="30"                           |            |
| 41 | FT |            | /label=PHSP60                            |            |
| 42 | FT |            | /note="HSP60 promoter region"            |            |
| 43 | FT | CDS        | 1790..2574                               |            |
| 44 | FT |            | /vntifkey="4"                            |            |
| 45 | FT |            | /label=apraR                             |            |
| 46 | FT | rep_origin | 2654..3034                               |            |
| 47 | FT |            | /vntifkey="33"                           |            |
| 48 | FT |            | /label=oriE                              |            |
| 49 | FT | promoter   | 399..445                                 |            |
| 50 | FT |            | /vntifkey="30"                           |            |
| 51 | FT |            | /label=PwhiB7                            |            |
| 52 | SQ | Sequence   | 5370 BP; 1107 A; 1560 C; 1642 G; 1061 t; |            |

|    |            |             |             |             |             |             |      |
|----|------------|-------------|-------------|-------------|-------------|-------------|------|
| 53 |            |             |             |             |             |             |      |
| 54 | ctagacggtg | accacaacgc  | gccgcgtttg  | atcggggacg  | tctgcggccg  | accatttacg  | 60   |
| 55 | ggtcttggtg | tcggttggcg  | tcattgggccc | aacataactca | cccggatcgg  | agggccgagg  | 120  |
| 56 | acaaggtcga | acgaggggca  | tgaccgggtg  | cggggcttct  | tgcactcggc  | ataggcgagt  | 180  |
| 57 | gctaagaata | acgttggcac  | tcgcgaccgg  | tgagtgctag  | gtcgggacgg  | tgaggccagg  | 240  |
| 58 | cccgtcgctg | cagcgagtgg  | cagcgaggac  | aacttgagcc  | gtccgctcgg  | ggcactgcgc  | 300  |
| 59 | ccggccagcg | taagtagcgg  | ggttgccgtc  | accgggtgac  | ccccgtttca  | tccccgatcc  | 360  |
| 60 | ggaggaatca | cttcgcactg  | caggtatcgc  | cgcaggtcaa  | aaataacttg  | tcaaccgata  | 420  |
| 61 | ggtgaccttt | tactctgggc  | ttcaggaatt  | cgcgaggatt  | ccaaaccaag  | acctgttcac  | 480  |
| 62 | gtgcgagtag | acggaaggag  | gagcgaaatg  | aacacaccca  | ccaattacgg  | agacaccttg  | 540  |
| 63 | tggcgtgatg | cccattggtg  | ctttgtcgtg  | ttgccgatcg  | ctccgcccgc  | gctccagacg  | 600  |
| 64 | cgtgccgccc | ccaagccggc  | ggtgactgcc  | gtggtgatgg  | ccggctcggc  | ttcccgatatt | 660  |
| 65 | aagcaccccg | ccgcccgtcg  | agccgcgaat  | gtcgcgtccg  | tgaatagggg  | atacatctag  | 720  |
| 66 | gtatccccac | aaccgcctcc  | caggccacgg  | accggacacc  | accgggatcc  | gtggccacat  | 780  |
| 67 | ttgtttgagc | cccaaacctc  | aagcgtggtt  | ccggatctcg  | atcgataaga  | caccgatacg  | 840  |
| 68 | agaccagcag | ttttacgagg  | aaccgaagag  | gaagcaggtg  | aacggacaca  | tgatgaccgt  | 900  |
| 69 | tgaagtggag | gcccgaagac  | tcgcgctgcc  | gtgccacgtc  | gcgagcggcg  | acctgtgggt  | 960  |
| 70 | cgcggaagc  | ccgcccgacc  | tggagcgggc  | gaaggcgtg   | tgcgcccgact | gcccgatccg  | 1020 |
| 71 | gtcgcagtgc | ctggccgctg  | cgctggaccg  | cgagagccg   | tggggagtgt  | ggggcggatga | 1080 |
| 72 | gattcttgag | caggggacca  | ttgtggcggc  | caagcggccg  | cgtggacgcc  | cgcgcaagaa  | 1140 |
| 73 | cccactgccc | gacgcccaca  | ccgcccgggc  | atgacgccgc  | cgcccaagaa  | ggttgtaggg  | 1200 |
| 74 | cctgaagctt | ttaaggttta  | acggttgggg  | acaacaagcc  | agggatgtaa  | cgcactgaga  | 1260 |
| 75 | agcccttaga | gcctctcaaa  | gcaattttga  | gtgacacagg  | aacacttaac  | ggctgacatg  | 1320 |
| 76 | ggaattcttg | aagacgaaaag | ggcctcgtga  | tacgcctatt  | tttatagggt  | aatgtcatga  | 1380 |
| 77 | taataatggt | ttcttagacg  | tcaggtggca  | cttttcgggg  | ttaaagggct  | gcaggaattc  | 1440 |
| 78 | gatagcttgc | tgacgcccgt  | ggatacacca  | aggaaagtct  | acacgaaccc  | tttggcaaaa  | 1500 |
| 79 | tcctgtatat | cgtgcgaaaa  | aggatggata  | taccgaaaaa  | atcgctataa  | tgaccccgaa  | 1560 |
| 80 | gcaggggtat | gcagcggaaa  | atgcagctca  | cggtaactga  | tgccgtatgt  | gcagtaccag  | 1620 |
| 81 | cgtacggccc | acagaatgat  | gtcacgctga  | aaatgccggc  | ctttgatggg  | gttcatgtgc  | 1680 |
| 82 | agctccataa | gcaaaagggg  | atgataagtt  | tatcaccacc  | gactatttgc  | aacagtgccg  | 1740 |
| 83 | ttgatcgtgc | tatgatcgac  | tgatgtcatc  | agcgggtggag | tgcaatgtcg  | tgcaatacga  | 1800 |
| 84 | atggcgaaaa | gccagactca  | ctcgtcagct  | tctcaacctt  | ggggttacc   | ccggcgggtg  | 1860 |
| 85 | gctgctggtc | cacagctcct  | tccgtagcgt  | ccggcccctc  | gaagatgggc  | cacttggact  | 1920 |
| 86 | gatcgaggcc | ctgcgctgct  | cgctgggtcc  | gggagggacg  | ctcgtcatgc  | cctcgtggtc  | 1980 |
| 87 | aggtctggac | gacgagccgt  | tcgatcctgc  | cacgtcgccc  | gttacaccgg  | accttggagt  | 2040 |

|             |             |             |            |            |             |      |
|-------------|-------------|-------------|------------|------------|-------------|------|
| tgtctctgac  | acattctggc  | gcttgcacaa  | tgtaaagcgc | agcgcceatc | catttgccctt | 2100 |
| cgcgccagcg  | gggccacagg  | cagagcagat  | catctctgat | ccattgcccc | tgccacctca  | 2160 |
| ctcgccctgca | agcccggctc  | cccgtgtcca  | tgaactcgat | gggcaggtag | ttctcctcgg  | 2220 |
| cgtgggacac  | gatgccaaaca | cgacgctgca  | tcttgccgag | ttgatggcaa | aggttcccta  | 2280 |
| tggggtgccg  | agacactgca  | ccattcttca  | tgatggcaag | ttggtagcgc | tcgattatct  | 2340 |
| cgagaatgac  | cactgctgtg  | agcgctttgc  | cttggcggac | aggtggctca | aggagaagag  | 2400 |
| ccttcagaag  | gaaggtccag  | tcggtcatgc  | ctttgctcgg | ttgatccgct | cccgcgacat  | 2460 |
| tgtggcgaca  | gccctgggtc  | aactgggccc  | agatccgttg | atcttctctg | atccgccaga  | 2520 |
| ggcgggatgc  | gaagaatgcg  | atgcccgtcg  | ccagtcgatt | ggctgagctc | ataagttcct  | 2580 |
| attccgaagt  | tcctattctc  | tagtcgaggg  | ggggcccag  | cttagctggc | tagcgagtca  | 2640 |
| tgaggtcacc  | atgctagtct  | cactgagcgt  | cagaccccgt | agaaaagatc | aaaggatctt  | 2700 |
| cttgagatcc  | ttttttctg   | cgctaatct   | gctgcttca  | acaaaaaaaa | ccaccgctac  | 2760 |
| cagcgggtgt  | ttgtttgccg  | gatcaagagc  | taccaactct | ttttccgaag | gtaactggct  | 2820 |
| tcagcagtcg  | gcagataccc  | aatactgtcc  | ttctagtga  | ccgtagtta  | ggccaccact  | 2880 |
| tcaagaactc  | gttagcaccg  | cctacatacc  | tcgctctgct | aatcctgtta | ccagtggtcg  | 2940 |
| ctgccagtgg  | cgataagtcg  | tgtcttaccg  | ggttggactc | aagacgatag | ttaccggata  | 3000 |
| aggcgcagcg  | gtcgggctga  | acggggggtt  | cgtgcacaca | gccagcttg  | gagcgaacga  | 3060 |
| cctacaccga  | actgagatac  | ctacagcgtg  | agcattgaga | aagcgcacag | cttcccgaag  | 3120 |
| ggagaaaggc  | ggacaggtat  | ccgtaagcg   | gcagggctcg | aacaggagag | cgcacagagg  | 3180 |
| agcttccagg  | gggaaacgcg  | tggtatcttt  | atagtcctgt | cgggtttcgc | cacctctgac  | 3240 |
| ttgacgctcg  | atthttgtga  | tgctcgctcag | gggggcggag | cctatggaaa | aacgccagca  | 3300 |
| acgcggcctt  | tttacggttc  | ctggcctttt  | gctggccttt | tgctcacatg | ttctttcctg  | 3360 |
| cgttatcccc  | tgattctgtg  | gataaccgta  | ttaccgcctt | tgagtgagct | gataccgctc  | 3420 |
| gccgcagccg  | aacgaccgag  | cgcaacgcgt  | gagcccacca | gctccgtaag | ttcgggtgct  | 3480 |
| gtgtggctcg  | taccgcgca   | ttcaggcggc  | agggggtcta | acgggtctaa | ggcggcgtgt  | 3540 |
| acggccgcca  | cagcggctct  | tagcggcccg  | gaaacgtcct | cgaaacgacg | catgtgttcc  | 3600 |
| tcctggttgg  | tacaggtggt  | tgggggtgct  | cggctgtcgc | tggtgtttca | tcacagggc   | 3660 |
| tcgacgggag  | agcgggggag  | tgtgcagttg  | tgggggtggc | cctcagcgaa | atatctgact  | 3720 |
| tggagctcgt  | gtcggaccat  | acaccgggtga | ttaatcgtgg | tttattatca | agcgtgagcc  | 3780 |
| acgtcgcgga  | cgaatthgag  | cagctctggc  | tgccgtactg | gtccctggca | agcgacgatc  | 3840 |
| tgctcgaggg  | gatctaccgc  | caaagccgcg  | cgctcggcct | aggccgcgg  | tacatcgagg  | 3900 |
| cgaaccacac  | agcgtctggc  | aacctgctgg  | tcgtggacgt | agaccatcca | gacgcagcgc  | 3960 |
| tccgagcgtc  | cagcgcccgc  | gggtcccac   | cgctgcacaa | cgcgatcgtg | ggcaatcgcg  | 4020 |
| ccaacggcca  | cgcacacgca  | gtgtgggcac  | tcaacgcccc | tgttccacgc | accgaatac   | 4080 |
| cgcgcgtaaa  | gccgctcgca  | tacatggcgg  | cgctgcgccg | agcccttcgg | cgcgccgtcg  | 4140 |
| atggcgaccg  | cagttactca  | ggcctcatga  | ccaaaaaccc | cgccacatc  | gcctgggaaa  | 4200 |
| cggaatggct  | ccactcagat  | ctctacacac  | tcagccacat | cgaggccgag | ctcggcgcga  | 4260 |
| acatgccacc  | gcgcgctg    | cgtcagcaga  | ccacgtacaa | agcggctccg | acgccgctag  | 4320 |
| ggcggaattg  | cgcactgttc  | gattccgtca  | ggttgtgggc | ctatcttccc | gccctcatgc  | 4380 |
| ggatctacct  | gccgaccggg  | aacgtggacg  | gactcggccg | cgcgatctat | gccgagtgcc  | 4440 |
| acgcgcgaaa  | cgccgaatth  | ccgtgcaacg  | acgtgtgtcc | cggaccgcta | ccggacagcg  | 4500 |
| aggctccgcg  | catcgccaac  | agcatttggc  | ggttgatcac | aaccaagtcg | cgcatttggg  | 4560 |
| cggacgggat  | cgtggtctac  | gaggccacac  | tcagtgcgcg | ccatgcccgc | atctcgcgga  | 4620 |
| agggcgcagc  | agcgcgcacg  | gcggcgagca  | cagttgcgcg | gcgcgcaaa  | tccgcgtcag  | 4680 |
| ccatggaggc  | attgctatga  | gcgacggcta  | cagcgacggc | tacagcgacg | gctacaactg  | 4740 |
| gcagccgact  | gtccgcaaaa  | agcggcgcgt  | gaccgcgcc  | gaaggcgcct | gaatcaccgg  | 4800 |
| actatccgaa  | cgccacgtcg  | tccggctcgt  | ggcgcaggaa | cgacgcgagt | ggttcgccga  | 4860 |
| gcaggctgca  | cgccgcgaac  | gcattccgcg  | ctatcacgac | gacgagggcc | actcttggcc  | 4920 |
| gcaaacggcc  | aaacatttct  | ggctgcatct  | ggacaccgtt | aagcgactcg | gctatcgggc  | 4980 |
| gagaaagag   | cgtgcggcag  | aacaggaagc  | ggctcaaaa  | gcccacaacg | aagccgacaa  | 5040 |
| tccaccgctg  | ttctaacgca  | attggggagc  | gggtgtcgcg | ggggttccgt | ggggggttcc  | 5100 |
| gttgcaacgg  | gtcggacag   | taaaagtct   | ggttagacgt | agttttctgg | tttgggcat   | 5160 |
| gcctgtctcg  | ttgctgttth  | cgttgcgtcc  | gttttgaata | ccagccagac | gagacggggt  | 5220 |
| tctacgaaac  | ttggtcgata  | ccaagccatt  | tccgctgaat | atcgtggagc | tcaccgccag  | 5280 |
| aatcgtgggt  | tgtgggtgat  | tacgtggcga  | actccgttgt | agtgccttgt | gtggcatccg  | 5340 |
| tggcgcggcc  | gcggtaccag  | atctttaa    |            |            |             | 5370 |

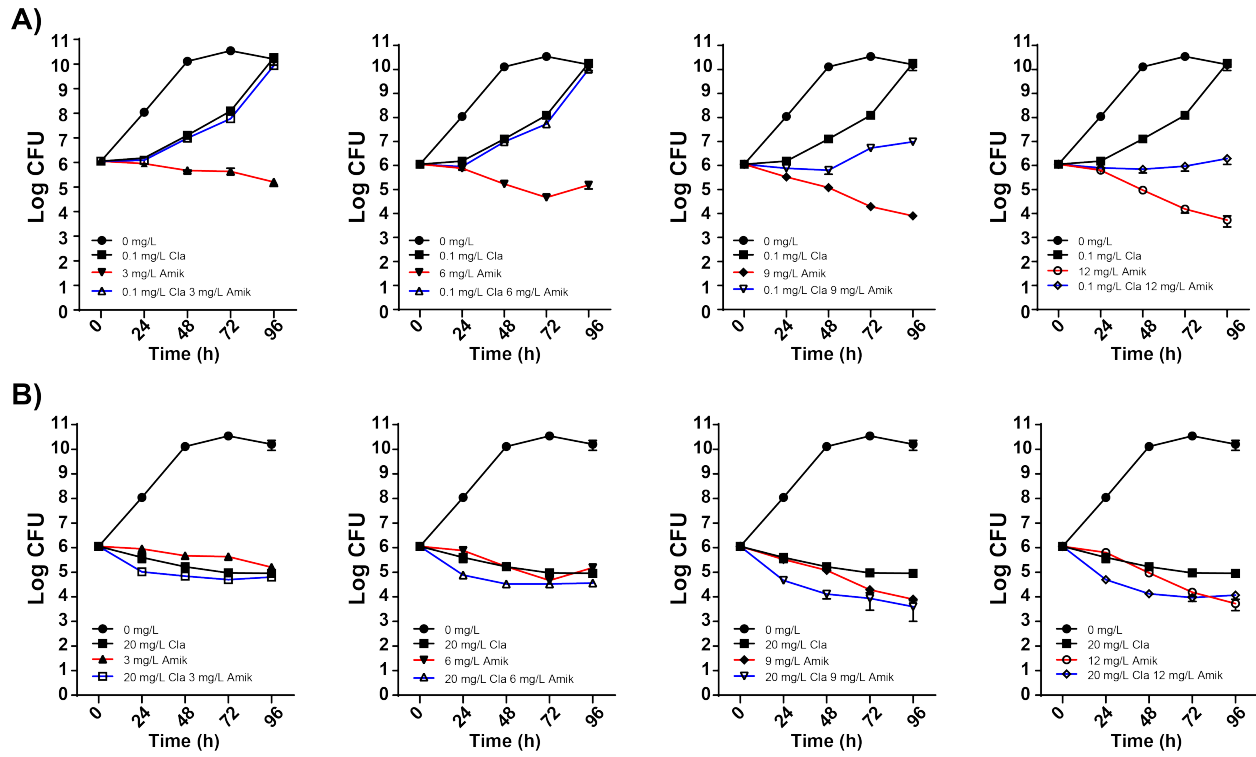

**Supplemental Figure S2. Simultaneous clarithromycin and amikacin treatment of *MAB*.** *MAB* was incubated with clarithromycin at **A)** 1/2 MIC (0.1 mg/L) or **B)** 100X MIC (20 mg/L) followed by immediate addition of a range of amikacin concentrations (3-12 mg/L). CFUs were monitored at 24 h intervals. Data points are the means of three replicates with error bars indicating standard deviation.

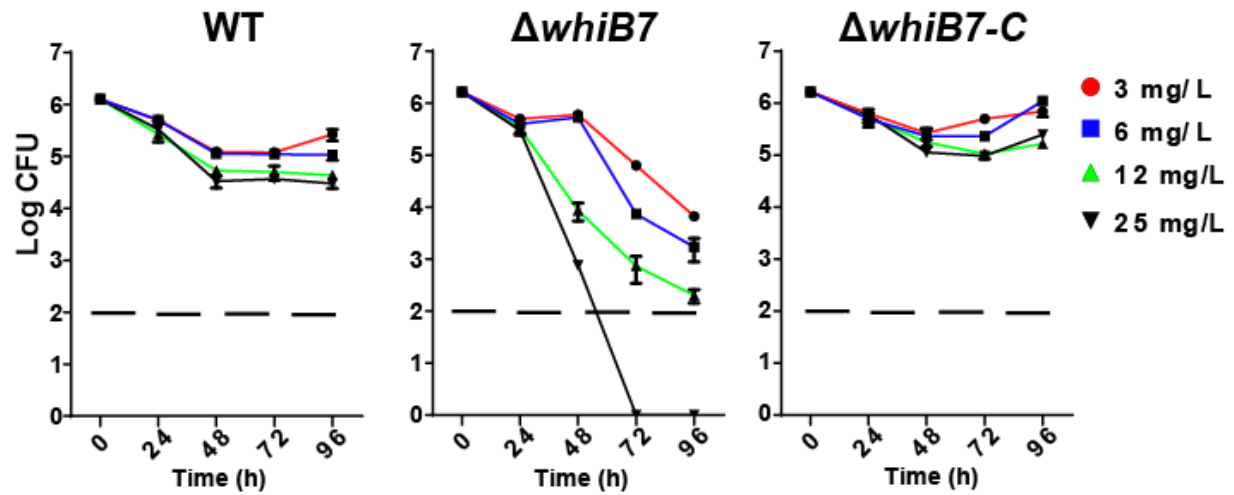

**Supplemental Figure S3: Effect of clinically-relevant clarithromycin concentrations on *MAB* wild type,  $\Delta whiB7$  and  $\Delta whiB7-C$  derivatives.** Strains were incubated with clarithromycin concentrations found in the lung. CFUs were monitored at 24 h intervals. Dashed lines represent the limit of detection. Data points are the mean of 3 replicates with standard deviation given as error bars. The data represents 3 independent experiments.

**Supplemental Table S1. Primers used in this study**

| Primer         | Sequence (5' to 3')               |
|----------------|-----------------------------------|
| whiB7-FW       | GAAATGAACACACCCACCAATTACG         |
| whiB7-RV       | GATCAGGTGATGGATTACATCAGAC         |
| aac(2)-FW      | GATCCACGGAAACTGGATAGTC            |
| aac(2)-RV      | GTTGTCTGACGAGGCGAC                |
| tap-FW         | GATTCGCCGACTATCAATCAGGTGAAT       |
| tap-RV         | GTTGGTTCCTTGTCGGGCTG              |
| WhiB7-iPCR-RV  | GCATAGGCCTCTTCCGCGAACCCACAGGTC    |
| WhiB7-iPCR-FW  | GCATAAGCTTGTGCGAGTGCCTGGC         |
| aac(2)-iPCR-RV | GCATAGGCCTATGAGTATGCCGTGGTACCAG   |
| aac(2)-iPCR-FW | GCATAAGCTTCGTGGAACGGACTTGGTAC     |
| tap-iPCR-RV    | CGATAAGCTTCTTCGTCGTGTCGATCATCG    |
| tap-iPCR-FW    | GCATACTAGTGTGACCCACATGGTGTGAC     |
| whiB7-OS-FW    | GGTAGCTGCCGTGTTGAT                |
| whiB7-OS-RV    | GTCGACCGACCTGTTGGAC               |
| aac(2)-OS-FW   | CCGATCCCGATGCCTTG                 |
| aac(2)-OS-RV   | CGTGTTCTACATCGGTAGTTGTCTG         |
| tap-OS-FW      | GATCCCGATCTGGAGGC                 |
| tap-OS-RV      | CCCGTGATCAGTGCGAC                 |
| whiB7-C-FW     | CGATCTGCAGGTATCGCCGAGGTCAAAAATAAC |
| whiB7-C-RV     | GCATAAGCTTCAGGCCCTACAACCTTCTTG    |
| whiB7-qPCR-FW  | ACCTCAAGCGTGGTTCCG                |
| whiB7-qPCR-RV  | CCTCCACTTCAACGGTCATC              |
| aac(2)-qPCR-FW | CTGTGTCCAATATGCCAACC              |
| aac(2)-qPCR-RV | GAATGCCTCAATGAGTAATTCAC           |
| erm-qPCR-FW    | GGAGTTCGTTGTGGATCTGG              |
| erm-qPCR-RV    | AAACCGTGAACGAAGGTGTC              |
| eis2-qPCR-FW   | GAGGTCAACCGCAAATTCAC              |
| eis2-qPCR-RV   | CACGACATGACGGCTGAAC               |
| sigA-qPCR-FW   | CACAAAGGGTTACAAGTTCTCG            |
| sigA-qPCR-RV   | GCTTGTTGATGACCTCGACC              |

**Supplemental Table S2. The effect of *whiB7* deletion on the resistance profile of *MAB*.**

| Drug         | MIC (mg/L) |                |
|--------------|------------|----------------|
|              | WT         | $\Delta whiB7$ |
| Imipenem     | 6.3        | 6.3            |
| Cefoxitin    | 50         | 50             |
| Doxycycline  | >100       | >100           |
| Tetracycline | >100       | >100           |
| Clindamycin  | 12.5       | 25             |
| Levofloxacin | 3.1        | 3.1            |
| Moxifloxacin | 1.6        | 1.6            |
| Rifabutin    | 6.3        | 6.3            |
| Rifamycin    | >100       | >100           |
| Rifamycin SV | 25         | 25             |
| Isoniazid    | >100       | >100           |
| Ethambutol   | >100       | >100           |

**Supplemental Table S3: Roles of *tap* and *eis* in aminoglycoside resistance.**

| Drug       | Amikacin MIC (mg/L)   |                  |              |                                  |                  |              |
|------------|-----------------------|------------------|--------------|----------------------------------|------------------|--------------|
|            | 0 mg/L Clarithromycin |                  |              | $\frac{1}{2}$ MIC Clarithromycin |                  |              |
|            | WT                    | $\Delta aac(2')$ | $\Delta tap$ | WT                               | $\Delta aac(2')$ | $\Delta tap$ |
| Amikacin   | 3.1                   | 3.1              | 3.1          | 12.5                             | 12.5             | 12.5         |
| Tobramycin | 6.3                   | 0.4              | 6.3          | 25                               | 0.4              | 25           |
| Gentamicin | 6.3                   | 3.1              | 3.1          | 25                               | 6.3              | 12.5         |
| Sisomicin  | 3.1                   | 0.8              | 3.1          | 12.5                             | 0.8              | 12.5         |

Values are the medians of 3 experiments.
